# Supplementary material for: Microbubble-enhanced ultrasound for the antivascular treatment and monitoring of hepatocellular carcinoma
Source: PubMed Central journal article supplement (PMC6821993; doi:10.7150/ntno.39514), 2019-10-01
Supplement: ntnov03p0331s1.pdf [file ntnov03p0331s1.pdf]

## Supplementary Information

**Table S1: Contrast enhanced ultrasound quantitative parameters before and after AVUS**

|                                                           | Sham                 |                       |             | Primary Dose AVUS    |                       |              | Reduced Dose AVUS    |                       |             |
|-----------------------------------------------------------|----------------------|-----------------------|-------------|----------------------|-----------------------|--------------|----------------------|-----------------------|-------------|
|                                                           | Pre Mean( $\pm$ SEM) | Post Mean( $\pm$ SEM) | P-Value     | Pre Mean( $\pm$ SEM) | Post Mean( $\pm$ SEM) | P-Value      | Pre Mean( $\pm$ SEM) | Post Mean( $\pm$ SEM) | P-Value     |
| <b>NLC Peak Enhancement</b>                               | 3.9 (2.4)            | 3.1 (1.7)             | <i>0.17</i> | 5.3 (1.3)            | 2.8 (0.7)             | <i>0.003</i> | 4.7 (1.5)            | 6.9 (2.7)             | <i>0.90</i> |
| <b>NLC Perfusion Index</b>                                | 4.0 (2.7)            | 3.2 (1.7)             | <i>0.20</i> | 4.7 (1.2)            | 2.8 (0.7)             | <i>0.007</i> | 3.6 (1.0)            | 6.7 (2.7)             | <i>0.93</i> |
| <b>NLC Time to Peak</b>                                   | 16.8 (2.8)           | 25.3 (7.3)            | <i>0.07</i> | 16.5 (1.8)           | 24.6 (3.0)            | <i>0.009</i> | 23.1 (2.6)           | 26.8 (4.9)            | <i>0.26</i> |
| <b>PD Peak Perfused Area</b>                              | 79.3 (9.9)           | 76.4 (9.1)            | <i>0.16</i> | 87.2 (3.6)           | 73.2 (6.0)            | <i>0.014</i> | 67.5 (9.3)           | 68.2 (8.6)            | <i>0.54</i> |
| <b>PD Perfusion Area Index</b>                            | 95.6 (15.9)          | 88.8 (16.7)           | <i>0.26</i> | 104.3 (7.5)          | 77.8 (8.2)            | <i>0.009</i> | 82.7 (14.4)          | 77.1 (15.9)           | <i>0.23</i> |
| <b>PD Color Weighted Fractional Area Peak Enhancement</b> | 40.6 (6.6)           | 37.4 (6.7)            | <i>0.04</i> | 48.0 (3.0)           | 35.5 (3.6)            | <i>0.007</i> | 37.7 (6.6)           | 33.6 (3.7)            | <i>0.22</i> |
| <b>Delta Projection Area</b>                              | 57.6 (10.0)          | 58.2 (10.2)           | <i>0.63</i> | 75.7 (4.2)           | 59.1 (6.4)            | <i>0.002</i> | 66.8 (8.2)           | 64.3 (7.8)            | <i>0.29</i> |
